# Supplementary material for: Marker-Assisted Backcross Breeding for Improving Bruchid (Callosobruchus spp.) Resistance in Mung Bean (Vigna radiata L.)
Source: MDPI journal article supplement (doi:10.3390/agronomy12061271), 2022-05-26
Supplement: s1 [file s1]

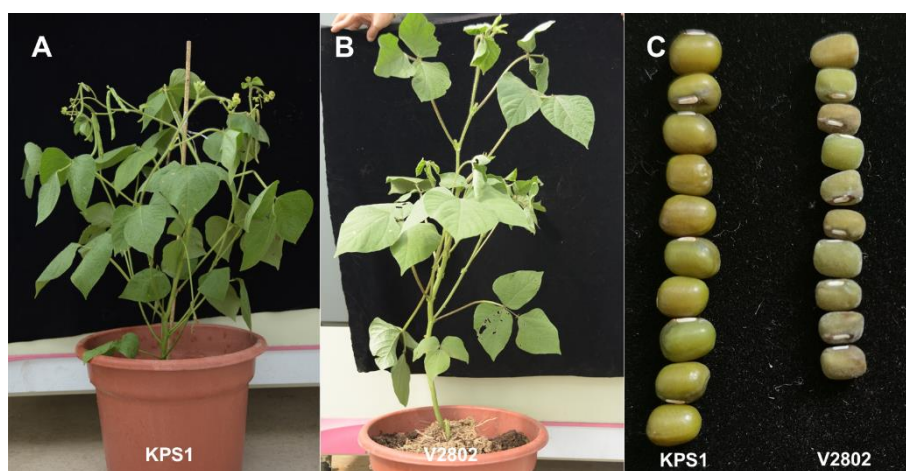

**Supplementary Figure S1.** The phenotype (A and B) and seed characteristics (C) of KPS1 and V2802. V2802 shows trailing growth habit (especial during later stage of growth) and late maturity.

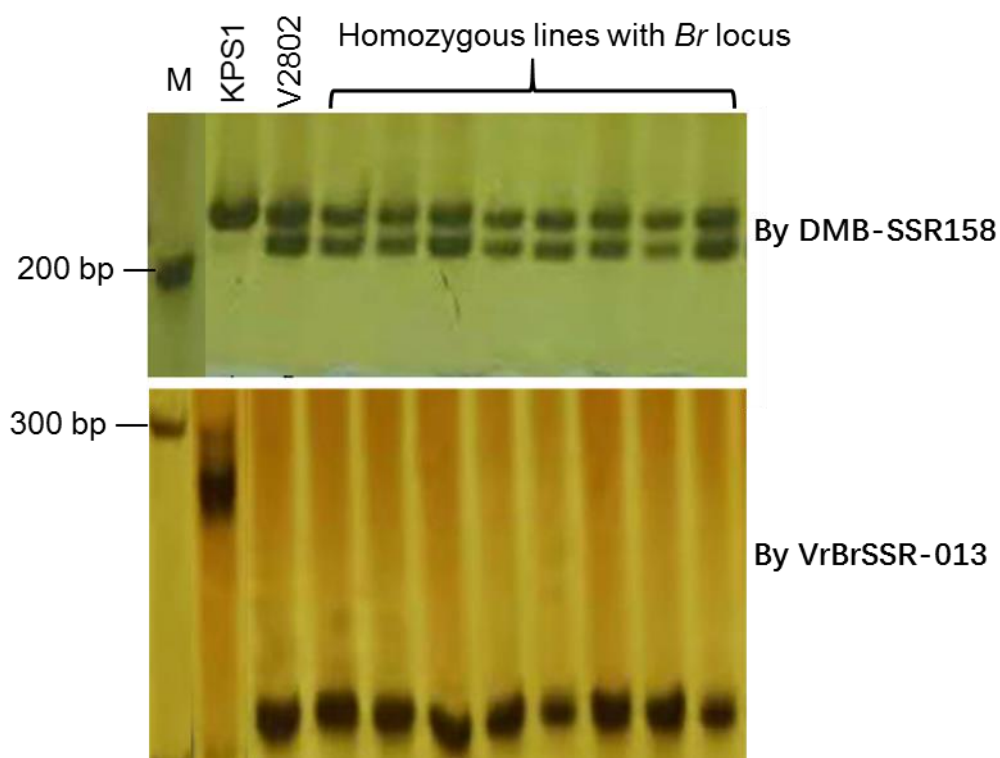

**Supplementary Figure S2.** Reconfirm the polymorphism of VrBR-SSR013 and DMB-SSR158 in genotyping.
