# Supplementary material for: Marker-Assisted Backcross Breeding for Improving Bruchid (Callosobruchus spp.) Resistance in Mung Bean (Vigna radiata L.)
Source: MDPI journal article supplement (doi:10.3390/agronomy12061271), 2022-05-26
Supplement: s1 [file s1]

Archive with 3 entries (3 files):
- Supplementary Figures.pdf
- Supplementary Table 1 Primers used for marker-assisted selection of the VrPGIP2 gene conferring bruchid resistance in V2802.xlsx
- Supplementary Table 2. 118 SNPs in genetic background analysis.xlsx
