# Supplementary material for: Marker-Assisted Backcross Breeding for Improving Bruchid (Callosobruchus spp.) Resistance in Mung Bean (Vigna radiata L.)
Source: MDPI journal article supplement (doi:10.3390/agronomy12061271), 2022-05-26
Supplement: s1 [file s1 › Supplementary Table 1 Primers used for marker-assisted selection of the VrPGIP2 gene conferring bruchid resistance in V2802.xlsx]

## Sheet: Sheet1
Supplementary Table S1. Primers used for marker-assisted selection of the VrPGIP2 gene conferring bruchid resistance in V2802
Marker names	SSR repeats	Primers sequence		Expected size (bp)	Reference
		Forward (5'-3')	Reverse (5'-3')
VrBr-SSR013	(ATG)5	CCTATCATGCCATCAATACTATCC	GATAAAACTAACAGAAGCCATACATC	138	Chotechung et al. (2016)
DMB-SSR158	(AATAA)2…(TG)3(TC)3	TGGAAAATTTGCAGCAGTTG	ATTGATGGAGGGCGGAAGTA	234	Somta et al. (2009)
