# Supplementary material for: Marker-Assisted Backcross Breeding for Improving Bruchid (Callosobruchus spp.) Resistance in Mung Bean (Vigna radiata L.)
Source: MDPI journal article supplement (doi:10.3390/agronomy12061271), 2022-05-26
Supplement: s1 [file s1 › Supplementary Table 2. 118 SNPs in genetic background analysis.xlsx]

## Sheet: Sheet1
Chromosome	Position	V2802	67-22	KPS1
1	1237812	A	C	C
1	5209025	A	G	G
1	5664840	G	C	C
1	8635580	G	C	C
1	11982635	T	C	C
1	12143327	T	C	C
1	12143328	C	T	T
1	19035958	T	C	C
1	21132178	C	T	T
1	31214368	T	G	G
1	31214380	G	C	C
1	31307123	C	T	T
1	31672128	T	C	C
1	33367780	C	T	T
1	33448743	C	A	A
1	33448815	C	A	A
2	3969461	G	A	A
2	8429641	G	C	C
2	11285157	A	T	T
2	23042076	T	G	G
3	1277246	A	T	T
3	5399824	T	C	C
3	6147399	C	T	T
4	821183	T	G	G
4	5284556	C	T	T
4	5318979	C	T	T
4	10020891	C	T	T
4	10026452	C	T	T
4	15225037	A	A	G
4	15419622	T	T	A
4	15419623	T	T	C
4	16638559	G	A	A
5	3034009	G	G	T
5	3034048	T	T	G
5	5027293	C	C	T
5	5027354	A	A	T
5	5202644	C	C	A
5	5413595	A	A	G
5	5413602	A	A	T
5	5415623	G	G	A
5	5415651	G	G	C
5	5415662	A	A	C
5	5415781	G	G	A
5	5415796	C	C	G
5	5415830	A	A	G
5	5417382	T	T	C
5	5420682	T	T	A
5	5420970	C	C	A
5	5423531	A	A	T
5	5423558	G	G	A
5	5423569	A	A	T
5	5423600	G	G	A
5	5423610	A	A	G
5	5423751	T	T	C
5	5423852	A	A	G
5	5423882	C	C	T
5	5423931	T	T	C
5	5423951	T	T	G
5	5424008	A	A	G
5	16817195	T	T	G
5	26078873	A	C	C
5	26078889	A	A	C
5	26078955	T	C	C
5	26080395	C	T	T
6	8578673	C	C	T
6	19818843	C	T	T
6	22838801	G	A	A
6	25182843	T	C	C
6	25182845	G	A	A
6	28859824	T	A	A
6	29061597	T	G	G
6	32413481	C	T	T
6	34943059	T	C	C
6	35234791	G	A	A
6	36188048	A	A	T
6	37049504	A	A	G
6	37049922	G	G	T
7	14508889	T	A	A
7	14508940	G	A	A
7	16449558	G	A	A
7	51553610	A	G	G
7	51556918	A	G	G
7	53364814	A	A	G
8	900515	G	G	T
8	1725246	T	T	C
8	39995004	C	C	G
8	43041209	C	T	T
9	4687742	C	G	G
9	8345654	C	T	T
9	9766100	A	G	G
9	10229566	C	G	G
9	10781783	C	T	T
9	18634181	C	A	A
9	18634258	A	G	G
9	18634337	T	A	A
9	18634340	A	G	G
9	18634351	A	G	G
9	19365661	A	G	G
9	19506340	T	C	C
9	19506350	G	A	A
9	19506354	C	T	T
9	19506356	G	A	A
9	20135410	C	T	T
10	4739947	G	G	A
10	4739955	C	C	T
10	4739967	T	T	A
10	5732357	G	G	T
10	7109876	T	C	C
10	7109884	A	A	G
10	7109890	T	T	C
10	7109908	G	G	A
10	7365879	G	G	T
10	7365898	G	G	T
10	11087437	A	A	G
11	9775514	A	A	G
11	9775537	A	A	C
11	12791081	A	G	G
11	14970270	T	C	C
